# Supplementary material for: Fabrication of silica/polyrhodanine core/shell nanoparticles and their antibacterial properties
Source: Royal Society of Chemistry journal article supplement (doi:10.1039/c1jm13017j), 2011-01-01
Supplement: c1jm13017j.pdf [file c1jm13017j.pdf]

## Supporting Information

### Fabrication of silica/polyrhodanine core/shell nanoparticles and their antibacterial properties

*Jooyoung Song, Hee Song, Hyeyoung Kong, Jin-Yong Hong and Jyongsik Jang\**

World Class University (WCU) Program of Chemical Convergence for Energy & Environment (C2E2), School of Chemical and Biological Engineering, College of Engineering, Seoul National University (SNU), 599 Gwanak-ro, Gwanak-gu, Seoul, Korea.

Telephone: (+82) 2-880-7069

Fax: (+82) 2-888-1604

E-mail: [jsjang@plaza.snu.ac.kr](mailto:jsjang@plaza.snu.ac.kr)

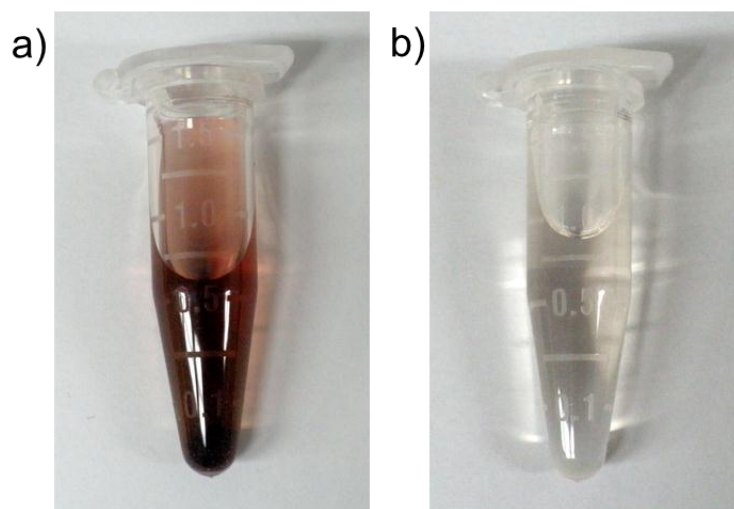

**Fig. S1** Photographs of NMP solvents mixed with (a) the silica/polyrhodanine core/shell nanoparticle dispersed aqueous solution and (b) the upper solution of the nanoparticles precipitated aqueous solution.

### Biocidal test for conducting polymer coated silica nanoparticles

To study the role of oxygen and sulfur groups on antibacterial properties, the 26 nm sized polythiophene (PT) and poly(3,4-ethylenedioxythiophene) (PEDOT) coated silica nanoparticles were prepared.<sup>32</sup> The 27 nm silica/polyrhodanine core/shell nanoparticles were also prepared for comparison. Each nanoparticles dispersed aqueous solution (10 mg/mL) was inoculated with 50  $\mu$ L of *S. aureus* suspension ( $10^6$ - $10^7$  CFU/mL). After a specific contact time, 50  $\mu$ L aliquots were taken from each tube and cultured on LB agar plates. The LB agar plates were kept at 37°C for 24 h and the number of bacterial colonies was observed and counted to evaluate antibacterial performance.

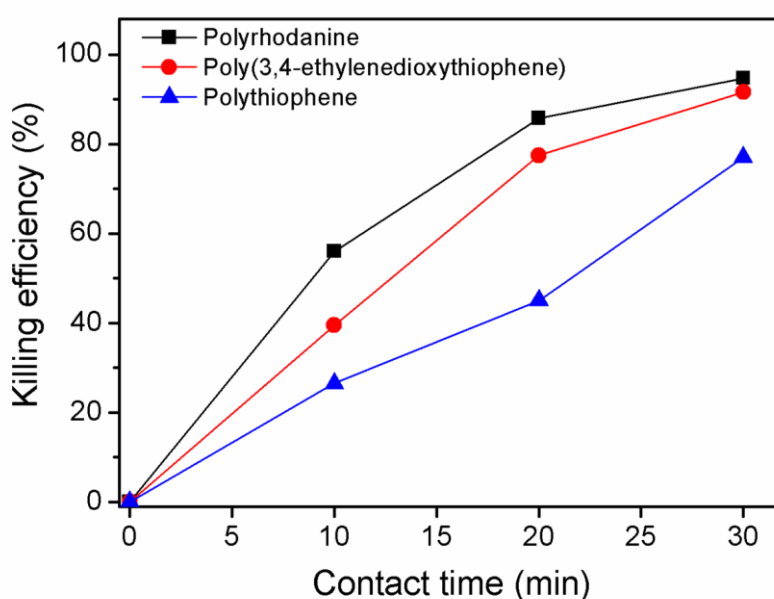

**Fig. S2** Plot of killing efficiency versus contacting time (min) of the different polymer coated silica nanoparticles against *S. aureus*. The killing efficiency was obtained as killing efficiency =  $(1 - A/B) \times 100$  (where B is the number of surviving bacteria colonies in the control and A is that of the core/shell nanoparticles sample).
